# Supplementary material for: Identification of SARS‐CoV‐2 Papain‐like Protease (PLpro) Inhibitors Using Combined Computational Approach
Source: PubMed Central journal article supplement — ChemistryOpen. 2022 Feb 1;11(2):e202100248. doi: 10.1002/open.202100248 (PMC8805381; doi:10.1002/open.202100248), 2022-02-01
Supplement: OPEN-11-e202100248-s003.pdf [file OPEN-11-e202100248-s003.pdf]

# ChemistryOpen

Supporting Information

## **Identification of SARS-CoV-2 Papain-like Protease (PLpro) Inhibitors Using Combined Computational Approach\*\***

Milan Sencanski, Vladimir Perovic, Jelena Milicevic, Tamara Todorovic, Radivoje Prodanovic, Veljko Veljkovic, Slobodan Paessler, and Sanja Glisic\*

## Supporting Information

Table S1. Ranking of the candidate compounds based on similarity distance from the centroid

|                                     |        |
|-------------------------------------|--------|
| Ergometrine                         | 1.0983 |
| Methylergometrine                   | 1.2657 |
| Clidinium                           | 1.6500 |
| Phentolamine                        | 1.7025 |
| Oxamniquine                         | 1.8842 |
| Metergoline                         | 2.0399 |
| Clonidine                           | 2.0595 |
| Indacaterol                         | 2.1215 |
| Methscopolamine bromide             | 2.1833 |
| Quinine                             | 2.2219 |
| Stiripentol                         | 2.2338 |
| Tubocurarine                        | 2.3355 |
| Dichlorobenzyl alcohol              | 2.4    |
| Osimertinib                         | 2.4437 |
| Eugenol                             | 2.4456 |
| Undecoylium chloride iodine complex | 2.5165 |
| Dihydro-alpha-ergocryptine          | 2.5484 |
| Lacosamide                          | 2.559  |
| Epicriptine                         | 2.5965 |
| Phenoxyethanol                      | 2.6076 |
| Mephenesin                          | 2.631  |
| Vandetanib                          | 2.7469 |
| Benzyl alcohol                      | 2.7908 |
| Bosutinib                           | 2.8336 |
| Medifoxamine                        | 3.0265 |
| Orciprenaline                       | 3.0323 |
| Cisatracurium                       | 3.037  |
| Methdilazine                        | 3.0404 |
| Almitrine                           | 3.1207 |
| Dimercaprol                         | 3.3001 |
| Fidaxomicin                         | 3.3195 |
| Sacubitril                          | 3.3286 |
| Guanidine                           | 3.5501 |
| Nabumetone                          | 3.6113 |
| Bepotastine                         | 3.7253 |

|                           |        |
|---------------------------|--------|
| Diacetyl benzoyl lathyrol | 3.746  |
| Ivabradine                | 3.9308 |
| Terconazole               | 4.0701 |
| Digoxin                   | 4.1656 |
| Cinoxate                  | 4.3016 |
| Citalopram                | 4.3764 |
| Escitalopram              | 4.3764 |
| Meglumine                 | 4.6809 |
| Troleandomycin            | 4.9497 |

Table S2. Statistics of the Plpro compounds PCA model

| Component | SSX   | SSXacc | VarX  | VarXacc |
|-----------|-------|--------|-------|---------|
| 1         | 34.61 | 34.61  | 33.13 | 33.13   |
| 2         | 13.03 | 47.64  | 12.09 | 45.23   |
| 3         | 10.86 | 58.5   | 10.34 | 55.57   |
| 4         | 7.77  | 66.28  | 7.45  | 63.03   |
| 5         | 4.41  | 70.69  | 4.05  | 67.08   |

Figure S1. PCA plot of the first two components, with marked Plpro cocrystalized compounds and candidates Ergometrine, Metergoline and Epicriptine

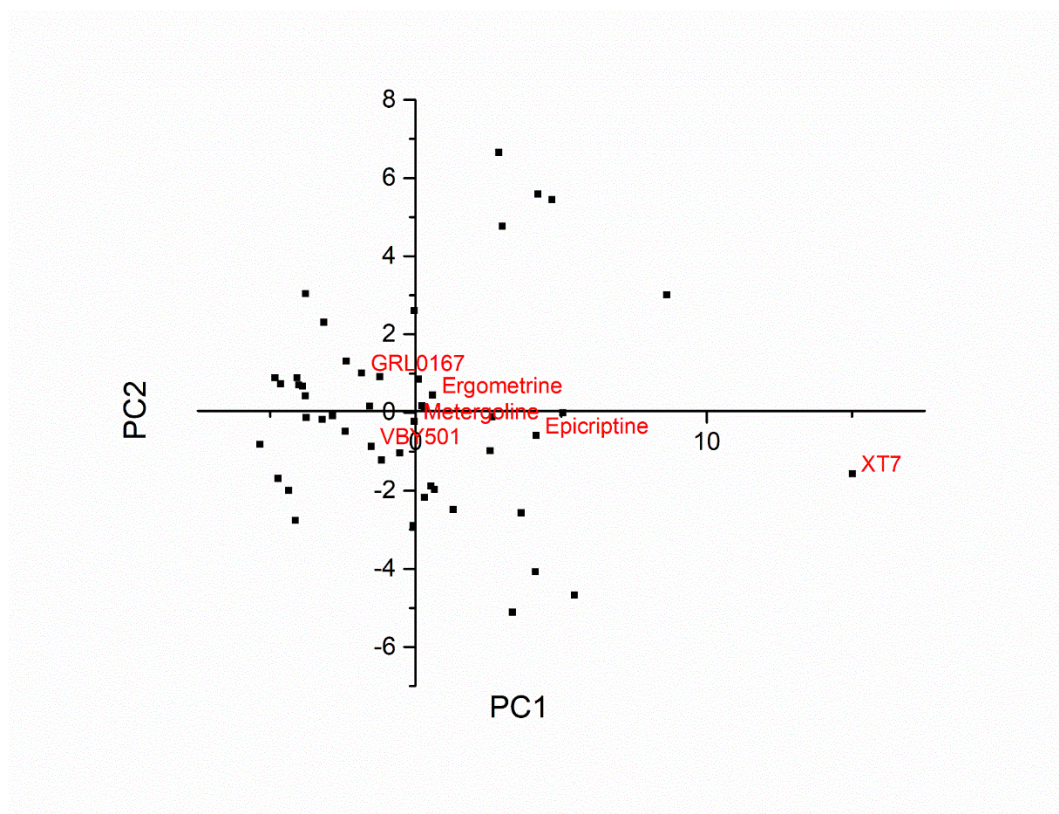

Table S3. Ranking of the PLpro candidate compounds, based on their docking score

| Compound name]             | Drugbank ID | Frequency | VINA binding energy (kcal/mol) |
|----------------------------|-------------|-----------|--------------------------------|
| GRL 0617                   | -           | 0.382     | -10.4                          |
| Epicriptine                | DB11275     | 0.382     | -10.3                          |
| XR8-89                     | -           | 0.279     | -10.2                          |
| VBY501                     | -           | 0.382     | -10.2                          |
| Metergoline                | DB13520     | 0.382     | -9.4                           |
| Dihydro-alpha-ergocryptine | DB11274     | 0.382     | -8.9                           |
| Digoxin                    | DB00390     | 0.279     | -8.8                           |
| Phentolamine               | DB00692     | 0.279     | -8.3                           |
| Fidaxomicin                | DB08874     | 0.382     | -8.1                           |
| Ergometrine                | DB01253     | 0.382     | -8.0                           |
| Sacubitril                 | DB09292     | 0.279     | -7.8                           |
| Almitrine                  | DB01430     | 0.382     | -7.7                           |
| Osimertinib                | DB09330     | 0.279     | -7.6                           |
| Indacaterol                | DB05039     | 0.279     | -7.6                           |
| Methylegometrine           | DB00353     | 0.382     | -7.6                           |
| Diacetyl benzoyl lathyrol  | DB11260     | 0.279     | -7.5                           |
| Bosutinib                  | DB06616     | 0.279     | -7.4                           |
| Tubocurarine               | DB01199     | 0.279     | -7.4                           |
| Terconazole                | DB00251     | 0.382     | -7.3                           |
| Ivabradine                 | DB09083     | 0.382     | -7.0                           |
| Vandetanib                 | DB05294     | 0.382     | -7.0                           |
| Citalopram                 | DB00215     | 0.382     | -7.0                           |
| Quinine                    | DB00468     | 0.382     | -7.0                           |
| Clidinium                  | DB00771     | 0.279     | -7.0                           |
| Nabumetone                 | DB00461     | 0.382     | -7.0                           |
| Medifoxamine               | DB13219     | 0.382     | -6.9                           |
| Methdilazine               | DB00902     | 0.382     | -6.9                           |
| Stiripentol                | DB09118     | 0.382     | -6.8                           |
| Bepotastine                | DB04890     | 0.382     | -6.7                           |
| Oxamniquine                | DB01096     | 0.279     | -6.7                           |
| Orciprenaline              | DB00816     | 0.279     | -6.6                           |
| Methscopolamine            | DB00462     | 0.382     | -6.6                           |

|                                    |         |       |      |
|------------------------------------|---------|-------|------|
| bromide                            |         |       |      |
| Lacosamide                         | DB06218 | 0.382 | -6.4 |
| Escitalopram                       | DB01175 | 0.382 | -6.3 |
| Troleandomycin                     | DB13179 | 0.279 | -6.3 |
| Mephenesin                         | DB13583 | 0.382 | -6.2 |
| Cisatracurium                      | DB00565 | 0.382 | -5.9 |
| Clonidine                          | DB00575 | 0.382 | -5.9 |
| Eugenol                            | DB09086 | 0.382 | -5.9 |
| Cinoxate                           | DB15467 | 0.382 | -5.7 |
| Phenoxyethanol                     | DB11304 | 0.382 | -5.4 |
| Dichlorobenzyl alcohol             | DB13269 | 0.279 | -5.1 |
| Benzyl alcohol                     | DB06770 | 0.382 | -5.1 |
| Undecylium chloride iodine complex | DB09377 | 0.279 | -4.9 |
| Meglumine                          | DB09415 | 0.382 | -4.4 |
| Guanidine                          | DB00536 | 0.382 | -4.0 |
| Dimercaprol                        | DB06782 | 0.382 | -2.9 |

Figure S2. RMSD plot of the PLpro backbone atoms during the production phase of MD simulation in complex with Metergoline

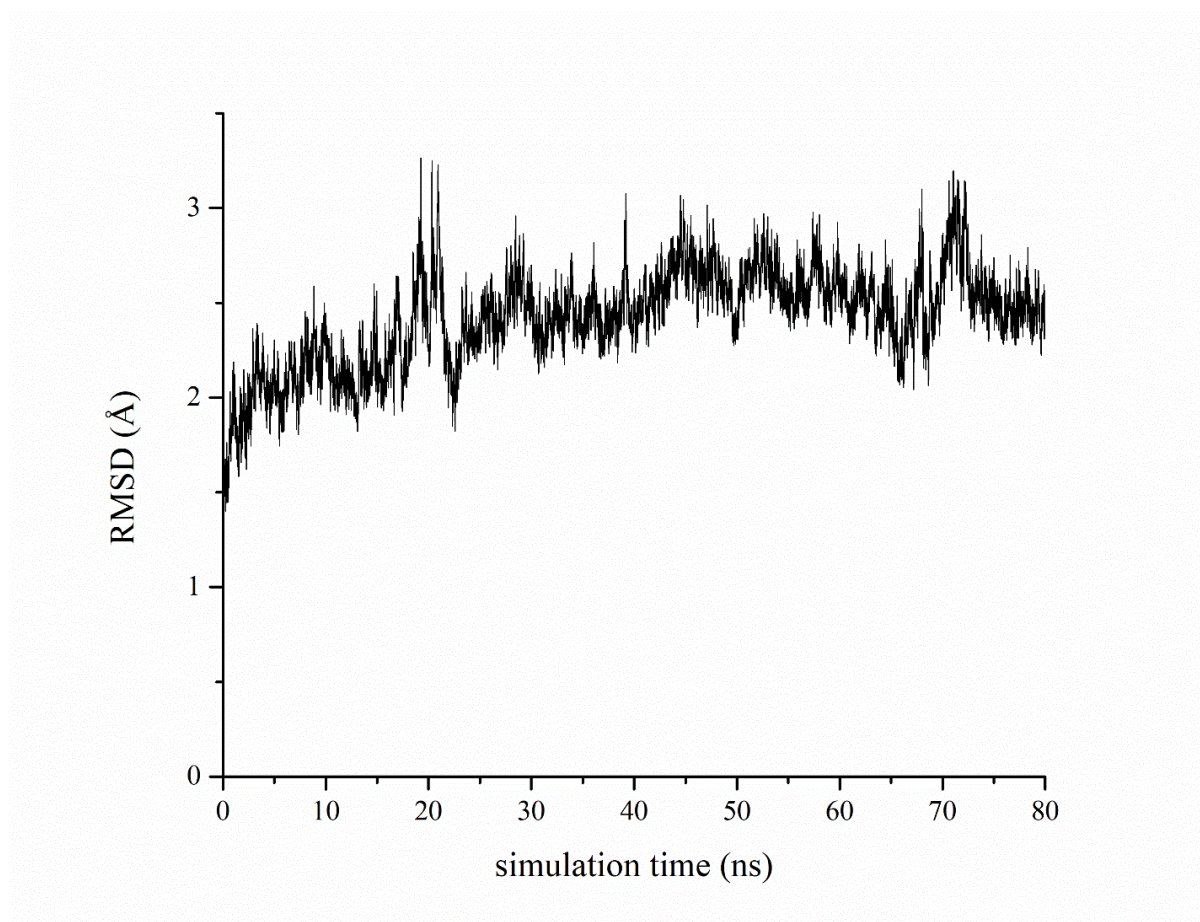

Figure S3. Metadynamics trajectory plot of the PLpro – Metergoline complex

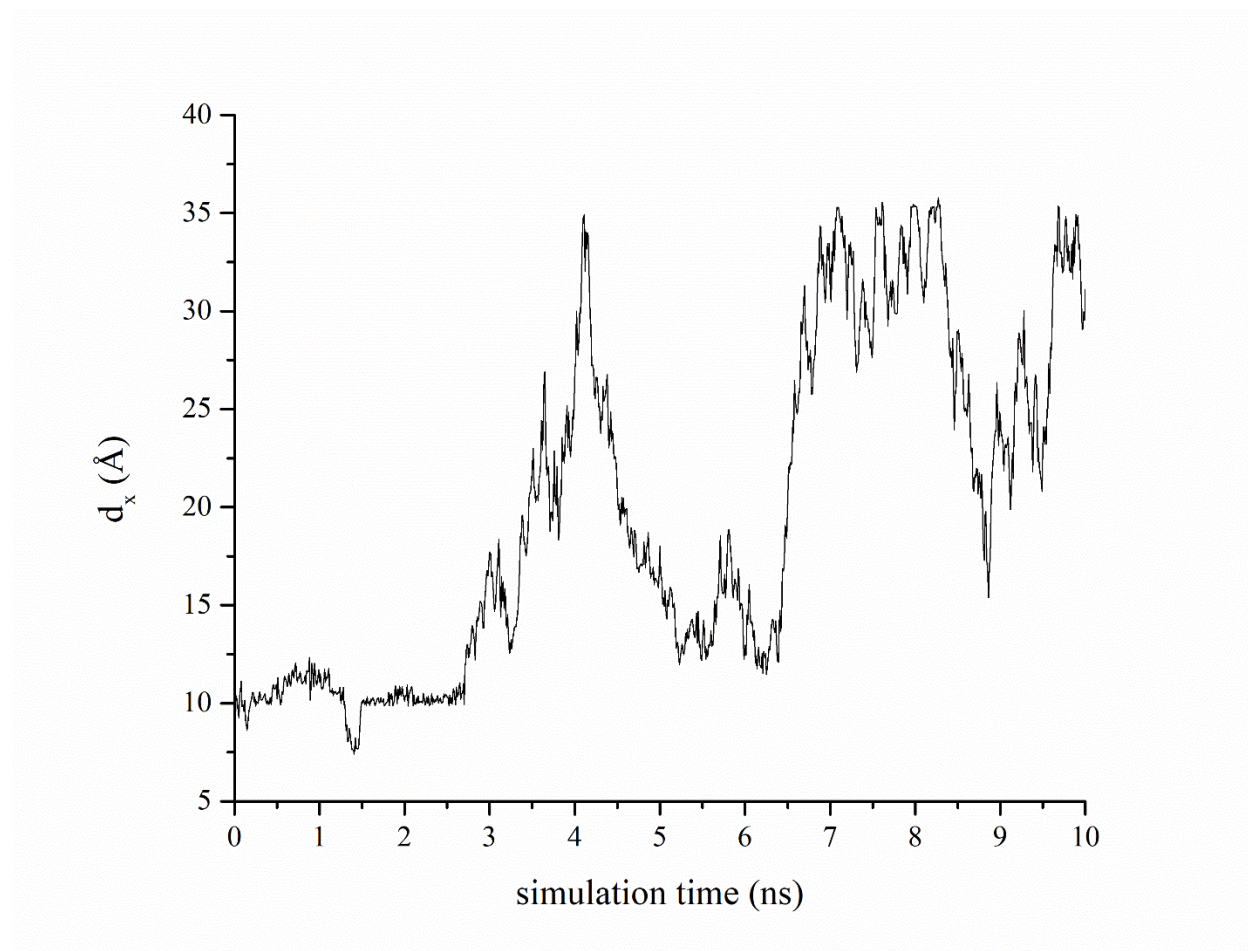

Table S4. RMSD and docking energy values between docked and co-crystallized conformations

| Ligand  | PDB structure | Binding energy (kcal/mol) | RMSD of the docked conformation from the co-crystallized (Å) |
|---------|---------------|---------------------------|--------------------------------------------------------------|
| GRL0167 | 7CJM          | -10.4                     | 0.3204                                                       |
| VBY501  | 7JIW          | -10.2                     | 0.0000                                                       |
| XR8-89  | 7LBR          | -10.5                     | 2.2253                                                       |

Additional material:

- 1) Video of the metadynamics simulation of the PLpro – Metergoline complex (Metadynamics.mp4)
- 2) SDF file of 1490 Drugbank approved drugs
